# Supplementary material for: Direct observation for relative-humidity-dependent mixing states of submicron particles containing organic surfactants and inorganic salts
Source: Copernicus journal article supplement (doi:10.5194/acp-23-8979-2023), 2023-08-11
Supplement: Supplementary file 1 [file acp-23-8979-2023-supplement.pdf]

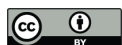

*Supplement of*

## **Direct observation for relative-humidity-dependent mixing states of submicron particles containing organic surfactants and inorganic salts**

**Chun Xiong et al.**

*Correspondence to:* Zhibin Wang (wangzhibin@zju.edu.cn)

The copyright of individual parts of the supplement might differ from the article licence.

NaCl-CH<sub>3</sub>SO<sub>4</sub>Na (OVF50%)

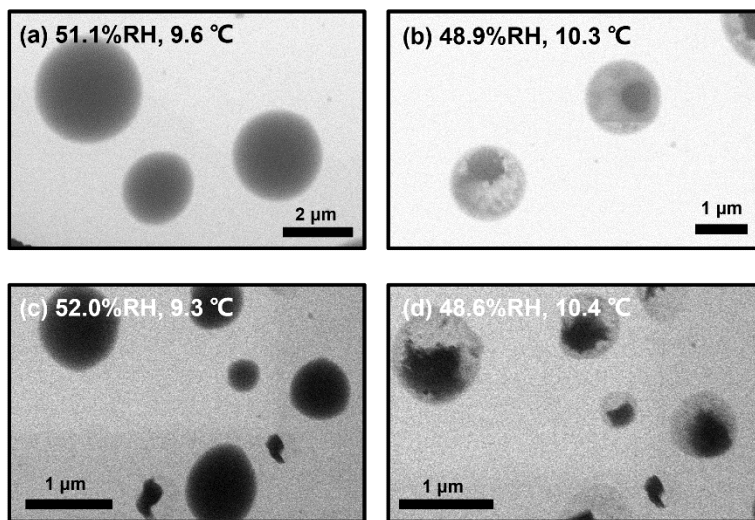

18

19

20 **Figure S1.** ESEM images of solid phase state of NaCl-CH<sub>3</sub>SO<sub>4</sub>Na with 50% OVF in two repeated  
21 experiments (Experiment 1: a and b, Experiment 2: c and d). Solid Phase separated RH showed good  
22 consistency.

23

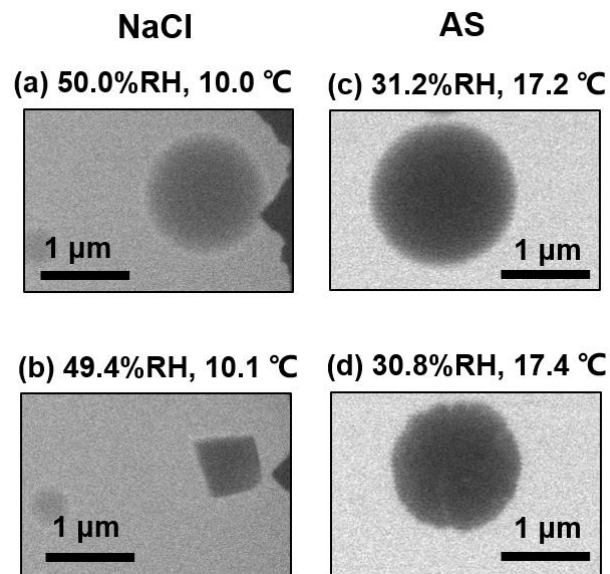

**Figure S2** ESEM images of efflorescence processes for (a–b) NaCl and (c–d) AS particles.

24  
25  
26  
27
